# Supplementary material
Source: ML conference proceedings conference paper supplement (https://openaccess.thecvf.com/content/ICCV2021/html/Tu_Adversarial_Attacks_on_ICCV_2021_paper.html)
Supplement: Supplementary file 3 [file Tu_Adversarial_Attacks_on_ICCV_2021_supplemental.zip]

Archive with 4 entries (4 files):
- 09139-supp.pdf
- __MACOSX/._09139-supp.pdf
- 09139.mp4
- __MACOSX/._09139.mp4
